# Supplementary material
Source: PubMed Central journal article supplement (PMC5395287)
Supplement: NIHMS831667-supplement.pdf [file NIHMS831667-supplement.pdf]

## The C677T Variant in *MTHFR* Modulates Associations Between Brain Integrity, Mood, and Cognitive Functioning in Old Age

### *Supplemental Information*

**Table S1.** Total medial orbitofrontal volumes by genotype groups (N=640)

|                                                       | <b>CC</b>                              | <b>CT</b>                            | <b>TT</b>                            | <b>Total</b>                         |
|-------------------------------------------------------|----------------------------------------|--------------------------------------|--------------------------------------|--------------------------------------|
| <i>N</i>                                              | 273                                    | 275                                  | 92                                   | 640                                  |
| Medial Orbitofrontal Volumes<br>(in mm <sup>3</sup> ) | 7,455.20<br>(± 1,027.22)<br>[7,451.00] | 7,514.64<br>(± 941.54)<br>[7,475.00] | 7,200.50<br>(± 973.04)<br>[7,199.50] | 7,444.13<br>(± 987.35)<br>[7,435.50] |
| Standardized Volumes<br>(z-scores)                    | 0.01<br>(± 1.04)<br>[0.01]             | 0.07<br>(± 0.95)<br>[0.03]           | -0.25<br>(± 0.99)<br>[-0.25]         | 0.00<br>(± 1.00)<br>[-.01]           |

N indicates sample sizes. Average volumes of the medial orbitofrontal cortices (in mm<sup>3</sup>) and standardized volumes (z-scores) are followed by standard deviations in parentheses. Median volumes are indicated in brackets.

**Table S2.** Results of multiple regression analyses: Predictors of medial orbitofrontal volumes and plasma homocysteine

| <b>Dependent Variable</b>      | <b>C677T</b>              | <b>Diagnosis</b>          | <b>Sex</b>                | <b>Age</b>                | <b>Corrected Model</b>    |
|--------------------------------|---------------------------|---------------------------|---------------------------|---------------------------|---------------------------|
| mOFC Volumes (N=640)           | 0.033<br>(3.428)<br>[2]   | <0.001<br>(19.295)<br>[2] | <0.001<br>(74.000)<br>[1] | <0.001<br>(44.541)<br>[1] | <0.001<br>(25.868)<br>[6] |
| mOFC Volumes (Recessive Model) | 0.009<br>(6.814)<br>[1]   | <0.001<br>(19.554)<br>[2] | <0.001<br>(74.219)<br>[1] | <0.001<br>(44.556)<br>[1] | <0.001<br>(31.077)<br>[5] |
| Homocysteine (N=732)           | <0.001<br>(10.375)<br>[2] | 0.016<br>(4.153)<br>[2]   | <0.001<br>(24.991)<br>[1] | <0.001<br>(28.839)<br>[1] | <0.001<br>(14.857)<br>[6] |
| Homocysteine (Recessive Model) | <0.001<br>(20.114)<br>[1] | 0.018<br>(4.053)<br>[2]   | <0.001<br>(25.342)<br>[1] | <0.001<br>(28.893)<br>[1] | <0.001<br>(17.708)<br>[5] |

Each row illustrates results of a separate GLM using the following equation: Dependent variable = C677T genotype + diagnosis + sex + age + intercept + error. The dependent variable and sample size are identified in the first column. For completeness, results obtained using a recessive model of minor T allele effects are presented below the default (additive) results discussed in the manuscript. *p*-values are followed by *F*-ratios in parentheses and degrees of freedom in brackets.

**Table S3.** Results of multiple regression analyses: Predictors of plasma homocysteine in the whole sample and by Vitamin B<sub>12</sub> deficiency status

| <b>Dependent Variable</b>                          | <b>C677T</b>              | <b>Diagnosis</b>        | <b>Sex</b>                | <b>Age</b>                | <b>Vitamin B<sub>12</sub> Deficiency</b> | <b>C677T * Vitamin B<sub>12</sub></b> | <b>Corrected Model</b>    |
|----------------------------------------------------|---------------------------|-------------------------|---------------------------|---------------------------|------------------------------------------|---------------------------------------|---------------------------|
| Homocysteine (N=675)                               | <0.001<br>(12.143)<br>[2] | 0.062<br>(2.787)<br>[2] | <0.001<br>(23.030)<br>[1] | <0.001<br>(27.032)<br>[1] | 0.021<br>(5.348)<br>[1]                  | 0.011<br>(4.529)<br>[2]               | <0.001<br>(10.007)<br>[9] |
| Homocysteine (Recessive Model)                     | <0.001<br>(21.469)<br>[1] | 0.079<br>(2.553)<br>[2] | <0.001<br>(23.898)<br>[1] | <0.001<br>(27.225)<br>[1] | 0.005<br>(7.987)<br>[1]                  | 0.007<br>(7.320)<br>[1]               | <0.001<br>(12.450)<br>[7] |
| Homocysteine (B <sub>12</sub> Deficient N=83)      | 0.008<br>(5.122)<br>[2]   | 0.572<br>(0.563)<br>[2] | 0.541<br>(0.377)<br>[1]   | 0.023<br>(5.366)<br>[1]   |                                          |                                       | 0.006<br>(3.270)<br>[6]   |
| Homocysteine (B <sub>12</sub> Deficient Recessive) | 0.003<br>(9.101)<br>[1]   | 0.503<br>(0.694)<br>[2] | 0.462<br>(0.547)<br>[1]   | 0.022<br>(5.498)<br>[1]   |                                          |                                       | 0.005<br>(3.692)<br>[5]   |
| Homocysteine (Non-Deficient N=592)                 | 0.055<br>(2.911)<br>[2]   | 0.010<br>(4.684)<br>[2] | <0.001<br>(24.127)<br>[1] | <0.001<br>(21.467)<br>[1] |                                          |                                       | <0.001<br>(10.925)<br>[6] |
| Homocysteine (Non-Deficient Recessive)             | 0.019<br>(5.513)<br>[1]   | 0.010<br>(4.656)<br>[2] | <0.001<br>(24.261)<br>[1] | <0.001<br>(21.654)<br>[1] |                                          |                                       | <0.001<br>(13.062)<br>[5] |

Rows 1-2 illustrate results of a GLM using the following equation: Plasma homocysteine = C677T genotype + diagnosis + sex + age + vitamin B<sub>12</sub> deficiency status + vitamin B<sub>12</sub> deficiency\*genotype + intercept + error. Row 3-4 illustrate results in deficient individuals. Rows 5-6 present results in non-deficient subjects. For completeness, results obtained using a recessive model of minor T allele effects are presented below the default (additive) results discussed in the manuscript. *p*-values are followed by *F*-ratios in parentheses and degrees of freedom in brackets.

**Table S4.** Results of multiple regression analyses: Predictors of mood

| <b>Dependent Variable: GDS-15</b> |                         | <b>Homo-cysteine</b>    | <b>Vitamin B<sub>12</sub> Deficiency</b> | <b>MMSE</b>               | <b>mOFC Volumes</b>     | <b>Age</b>               | <b>Sex</b>              | <b>Corrected Model</b>   |
|-----------------------------------|-------------------------|-------------------------|------------------------------------------|---------------------------|-------------------------|--------------------------|-------------------------|--------------------------|
| <b>GDS-15 (N=587)</b>             | 0.256<br>(1.368)<br>[2] | 0.823<br>(0.050)<br>[1] | 0.961<br>(0.002)<br>[1]                  | <0.001<br>(12.808)<br>[1] | 0.005<br>(7.840)<br>[1] | 0.107<br>(2.609)<br>[1]  | 0.527<br>(0.401)<br>[1] | <0.001<br>(3.855)<br>[8] |
| <b>GDS-15 (Recessive)</b>         | 0.517<br>(0.421)<br>[1] | 0.860<br>(0.031)<br>[1] | 0.925<br>(0.009)<br>[1]                  | <0.001<br>(13.285)<br>[1] | 0.005<br>(8.035)<br>[1] | 0.094<br>(2.6814)<br>[1] | 0.533<br>(0.388)<br>[1] | <0.001<br>(4.066)<br>[7] |

This table illustrates results of a GLM using the following equation: GDS-15 = C677T genotype + plasma homocysteine + vitamin B<sub>12</sub> deficiency status + MMSE + mOFC volumes + age + sex + intercept + error. For completeness, results obtained using a recessive model of minor T allele effects are presented below the default (additive) results discussed in the manuscript. *p*-values are followed by *F*-ratios in parentheses and degrees of freedom in brackets.

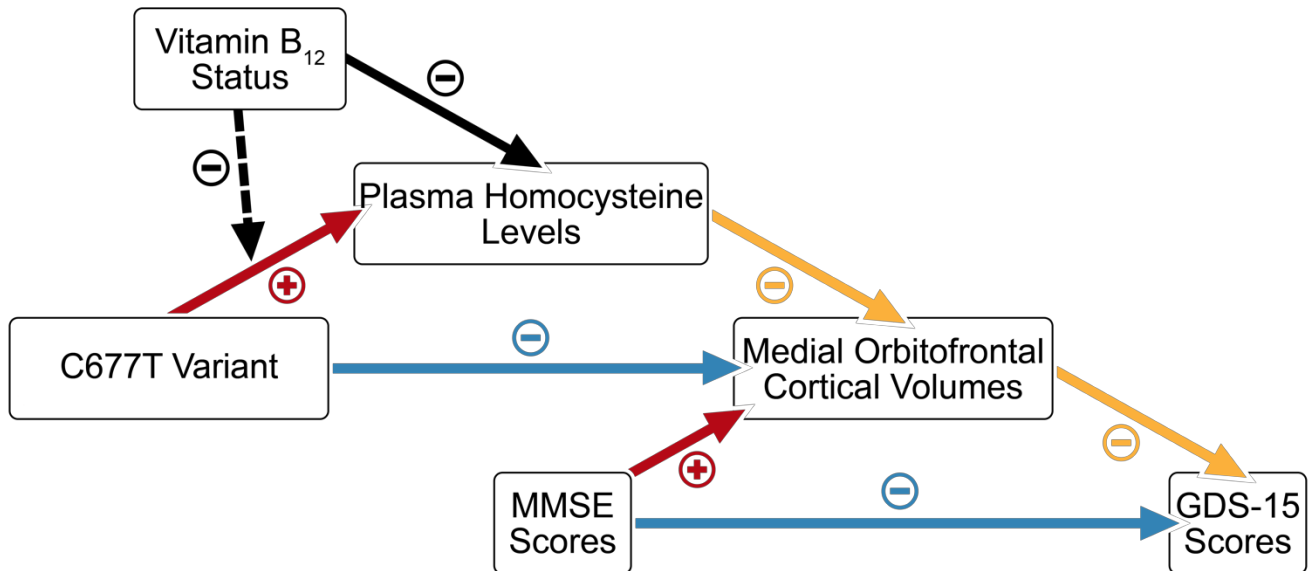

**Figure S1. Summary of proposed model.** Black arrows illustrate a simple association between two variables; dotted arrows denote moderation; colored arrows indicate mediation. A moderator variable influences the strength of a relationship between two other variables, while a mediator variable explains this relationship. Increased plasma homocysteine mediates the association between *MTHFR* genotype and lower medial orbitofrontal volumes, and these volumes mediate the association between MMSE and GDS-15 scores. Vitamin B<sub>12</sub> deficiency moderates the association between the C677T variant and increased homocysteine; it is also an independent predictor of elevated homocysteine.
